# Supplementary material for: Anti-dsDNA Antibodies Promote Initiation, and Acquired Loss of Renal Dnase1 Promotes Progression of Lupus Nephritis in Autoimmune (NZBxNZW)F1 Mice
Source: PLoS One. 2009 Dec 29;4(12):e8474. doi: 10.1371/journal.pone.0008474 (PMC2793523; doi:10.1371/journal.pone.0008474)
Supplement: Table S1 — Summary of data on mRNA levels of Dnase1, MMP2, and MMP9, anti-dsDNA antibody titers, deposits of immune complexes in the mesangial matrix and GBM, and proteinuria linked to each individual (NZBxNZW)F1 mice which are identified by labels. (0.03 MB XLS) [file pone.0008474.s001.xls]

## Sheet: Sheet1
	Mouse label		Age	Strain	Dnase I	MMP2	MMP9	EDS MM	EDS GBM	Anti-DNA titer	Proteinuria
	L4		4	(NZBxNZW)F1	1.63114	0.436765	1.4335	0	0	0	1
	L5		4	(NZBxNZW)F1	1.33677	0.723137	3.59931	0	0	0	1
	L6		4	(NZBxNZW)F1	1	1	1	0	0	0	1
	L7		6	(NZBxNZW)F1	2.03884	0.891811	2.17117	0	0	0	1
	L8		6	(NZBxNZW)F1	1.60635	0.79207	0.414686	0	0	0	1
	L9		6	(NZBxNZW)F1	2.33008	0.0398455	0.122026	0	0	0	1
	L10		8	(NZBxNZW)F1	1.14072	0.66467	0.8085	0	0	0	1
	L11		8	(NZBxNZW)F1	2.09073	0.296491	0.760895	0	0	0	1
	L12		8	(NZBxNZW)F1	0.375402	0.582888	0.515381	0	0	0	1
	L13		10	(NZBxNZW)F1	2.30202	0.882446	1.45859	0	0	0	1
	L14		10	(NZBxNZW)F1	1.3444	0.102227	0.129516	0	0	0	1
	L15		10	(NZBxNZW)F1	1.42015	0.911447	1.51219	0	0	0	1
	L16		12	(NZBxNZW)F1	1.17896	0.576611	0.847985	0	0	0	1
	L17		12	(NZBxNZW)F1	1.18334	0.0183828	0.0350855	0	0	0	1
	L18		12	(NZBxNZW)F1	0.875962	1.38713	1.4372	0	0	0	1
	L19		14	(NZBxNZW)F1	1.26604	0.86322	1.34023	0	0	0	1
	L20		14	(NZBxNZW)F1	0.888221	0.815021	0.900064	0	0	0	1
	L21		14	(NZBxNZW)F1	0.820525	0.834411	1.38618	0	0	0	1
	L22		16	(NZBxNZW)F1	1.52284	0.28986	0.605349	0	0	0	1
	L23		16	(NZBxNZW)F1	2.35241	0.0118576	0.0520369	0	0	0	1
	L24		16	(NZBxNZW)F1	1.64474	0.643584	0.786932	0	0	0	1
	L25		18	(NZBxNZW)F1	1.47002	0.595804	0.713557	1	0	600	1
	L26		18	(NZBxNZW)F1	1.44663	1.24666	1.82944	0	0	0	1
	L27		18	(NZBxNZW)F1	0.891632	0.588066	0.481664	0	0	120	1
	L28		20	(NZBxNZW)F1	1.86485	0.464674	0.44804	1	0	300	1
	L29		20	(NZBxNZW)F1	1.8536	0.422654	0.579492	0	0	0	1
	L30		20	(NZBxNZW)F1	2.50243	1.20068	0.659178	0	0	0	1
	L31		22	(NZBxNZW)F1	2.13665	1.32878	4.6256	1	0	400	1
	L32		22	(NZBxNZW)F1	0.950264	0.706729	0.527857	1	0	100	1
	L33		22	(NZBxNZW)F1	1.06571	0.88029	1.14099	1	0	170	1
	L43		23	(NZBxNZW)F1	0.939979	0.951114	0.832707	1	0	700	3
	L50		23	(NZBxNZW)F1	0.396362	0.334609	0.643932	1	2	100	4
	L34		24	(NZBxNZW)F1	1.33578	0.647257	0.728368	1	0	260	1
	L35		24	(NZBxNZW)F1	1.65109	0.301099	1.5569	0	0	0	1
	L36		24	(NZBxNZW)F1	2.25129	0.25593	1.72543	0	0	0	1
	H23		24	(NZBxNZW)F1	0.300162	1.46107	0.851483	1	2	400	4
	L37		26	(NZBxNZW)F1	1.65039	2.44465	4.11885	1	0	3200	1
	L45		26	(NZBxNZW)F1	4.11459	0.0650896	0.23834	1	0	3200	1
	L49		26	(NZBxNZW)F1	0.0998558	14.834	4.58671	1	2	120	4
	H21		27	(NZBxNZW)F1	0.319499	1.69122	0.775739	1	2	500	4
	L38		28	(NZBxNZW)F1	2.56461	2.0341	3.11945	1	0	0	1
	A20		28	(NZBxNZW)F1	0.919321	0.0699346	0.205751	1	0	180	2
	L44		29	(NZBxNZW)F1	0.341075	0.0642086	0.147184	1	0	200	4
	L52		29	(NZBxNZW)F1	1.44	0.89	2.72	1	2	340	4
	L53		29	(NZBxNZW)F1	0.64	1.24	2.03	1	0	290	3
	L54		30	(NZBxNZW)F1	7.22016	0.0706209	0.302557	1	0	290	1
	L55		30	(NZBxNZW)F1	11.8366	0.0553536	0.223564	1	0	800	1
	L56		30	(NZBxNZW)F1	6.56425	0.0631655	0.224051	1	0	300	1
	L40		31	(NZBxNZW)F1	0.0980628	0.245383	0.318919	1	2	200	4
	H10		32	(NZBxNZW)F1	0.355721	0.624139	0.370281	1	2	800	4
	H18		32	(NZBxNZW)F1	0.111656	1.88552	0.600147	1	2	200	4
	L46		35	(NZBxNZW)F1	1.09576	1.5429	1.41848	1	2	800	3
	H9		36	(NZBxNZW)F1	0.316158	1.24574	0.392974	1	2	1300	4
	A16		37	(NZBxNZW)F1	0.765174	0.0514213	0.175855	1	0	210	2
Mice where individaul data are missing: These mice are excluded from all figures where loci for immune complex deposition is analysed.
		L51	23	(NZBxNZW)F1	0.284717	0.589437	0.542728	NA	NA	NA	4
		H24	32	(NZBxNZW)F1	0.104124	3.09879	1.03949	NA	NA	400	4
								NA: Not analysed
